# Supplementary material for: A novel sp3Al-based porous single-ion polymer electrolyte for lithium ion batteries
Source: Royal Society of Chemistry journal article supplement (doi:10.1039/c5ra01126d), 2015-01-01
Supplement: c5ra01126d1.pdf [file c5ra01126d1.pdf]

## A novel $sp^3$ Al-based porous single-ion polymer electrolyte for lithium ion batteries

Guodong Xu,<sup>a</sup> Rupesh Rohan,<sup>a</sup> Jing Li<sup>a,b</sup> and Hansong Cheng<sup>\*a,b</sup>

<sup>a</sup> Department of Chemistry, National University of Singapore, 3 Science Drive 3, Singapore 117543. Email: Hansong Cheng: [chghs2@gmail.com](mailto:chghs2@gmail.com)

<sup>b</sup> Sustainable Energy Laboratory, China University of Geosciences Wuhan, 388 Lumo RD, Wuhan 430074, China.

Table S1: Comparison between LiPGAA and other gel single ion electrolytes.

| Name of SIPE                                                                                                                                                                            | Thermal degradation temperature (°C) | Ionic conductivity at 298K (S/cm) | Electrochemical window at 298K (V) | Lithium ion transference number | References                                |
|-----------------------------------------------------------------------------------------------------------------------------------------------------------------------------------------|--------------------------------------|-----------------------------------|------------------------------------|---------------------------------|-------------------------------------------|
| Polymeric lithium tartaric acid borate (PLTB)                                                                                                                                           | 330                                  | $1.4 \times 10^{-4}$              | 5.0                                | 0.93                            | Electrochim. Acta. 2013, <b>92</b> , 132  |
| Lithium poly (pyromellitic acid borate) (LiPPAB)                                                                                                                                        | 220                                  | $2.1 \times 10^{-4}$              | 5.0                                | 0.74                            | J. Mater. Sci. 2014, <b>49</b> , 6111     |
| Lithium poly (1,2,3,4-butanetetracarboxylic acid borate) (LiPBAB)                                                                                                                       | 245                                  | $2.4 \times 10^{-4}$              | 4.3                                | 0.89                            | RSC adv. 2014, <b>4</b> , 21163           |
| Lithium poly (4-vinylphenol) phenolate borate (LiVPPB)                                                                                                                                  | 120                                  | $4.4 \times 10^{-4}$              | 4.5                                | 0.91                            | Electrochim. Acta. 2014, <b>139</b> , 264 |
| Lithium poly [4-styrenesulfonyl (phenylsulfonyl) imide] (PSSPSI)                                                                                                                        | 420                                  | $6.3 \times 10^{-3}$              | *N/A                               | *N/A                            | J. Mater. Chem. A 2014, <b>2</b> , 2960   |
| Lithiated polyamide (LiPA)                                                                                                                                                              | 280                                  | $3.8 \times 10^{-4}$              | *N/A                               | 0.88                            | Energy Technol. 2014, <b>2</b> , 698      |
| Poly((2,2'-ethylenedioxy)-bis(ethylamine) isophthalic acid amide)-co-lithium poly((2,2'-ethylenedioxy) bis(ethylamine)bis(phenylsulfonyl imide)-isophthalate amide) (PEEIA-co-LiPEEPSI) | 220                                  | $3.3 \times 10^{-4}$              | 4.3                                | 0.91                            | RSC adv. 2014, <b>4</b> , 43857           |
| Lithium poly (glutaric acid aluminate) (LiPGAA)                                                                                                                                         | 350                                  | $1.4 \times 10^{-4}$              | 4.2                                | 0.80                            | This work                                 |

\*N/A : not presented in the paper.
